# Supplementary material
Source: MDPI journal article supplement (https://www.mdpi.com/2072-4292/10/1/32)
Supplement: s1 [file s1]

## Supplementary Material

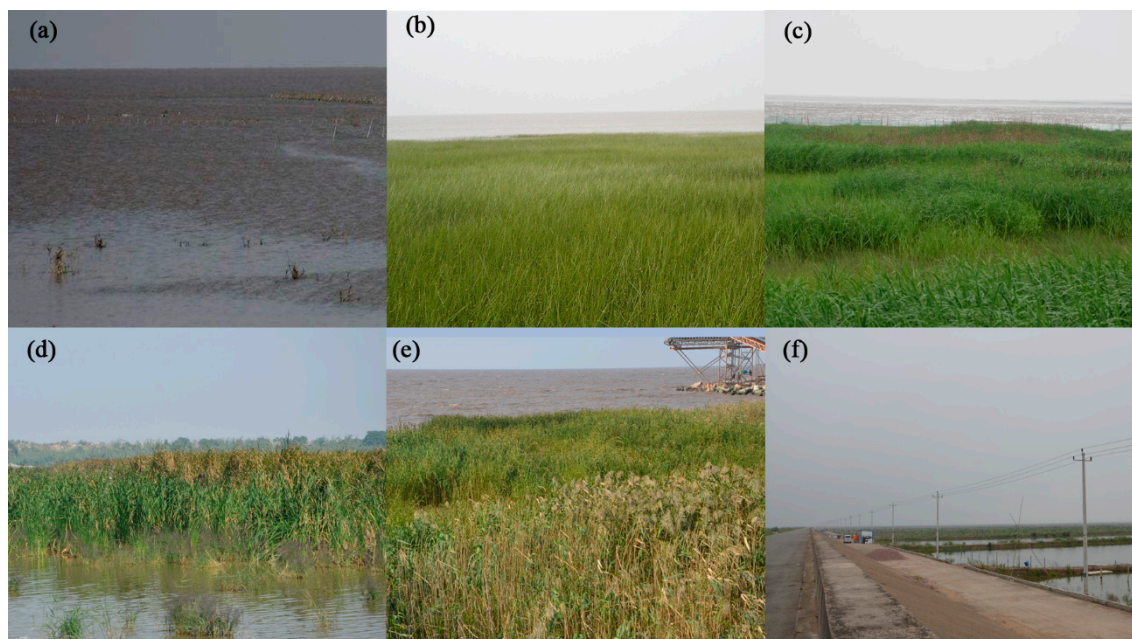

**Figure S1.** Ground photos (taken in September 2015) of the typical wetland landscapes in Hangzhou Bay. (a) muddy tidal flats with little vegetation coverage; (b) *Scirpus mariqueter*; (c) *Spartina alterniflora*; (d) freshwater herbaceous marsh (*Phragmites australis*); (e) *Spartina alterniflora* (upper part of the photo) and *Phragmites australis* (lower part of the photo); (f) water (aquaculture ponds with little vegetation cover) and construction land (road).
